# Supplementary material for: Amount of Mononuclear Phagocyte Infiltrate Does Not Predict Area of Experimental Choroidal Neovascularization (CNV)
Source: PubMed Central journal article supplement — J Ocul Pharmacol Ther. 2018 Sep 1;34(7):489–99. doi: 10.1089/jop.2017.0131 (PMC6152860; doi:10.1089/jop.2017.0131), 2018-09-01
Supplement: Supp_Fig2.pdf [file Supp_Fig2.pdf]

## Supplemental Figure 2

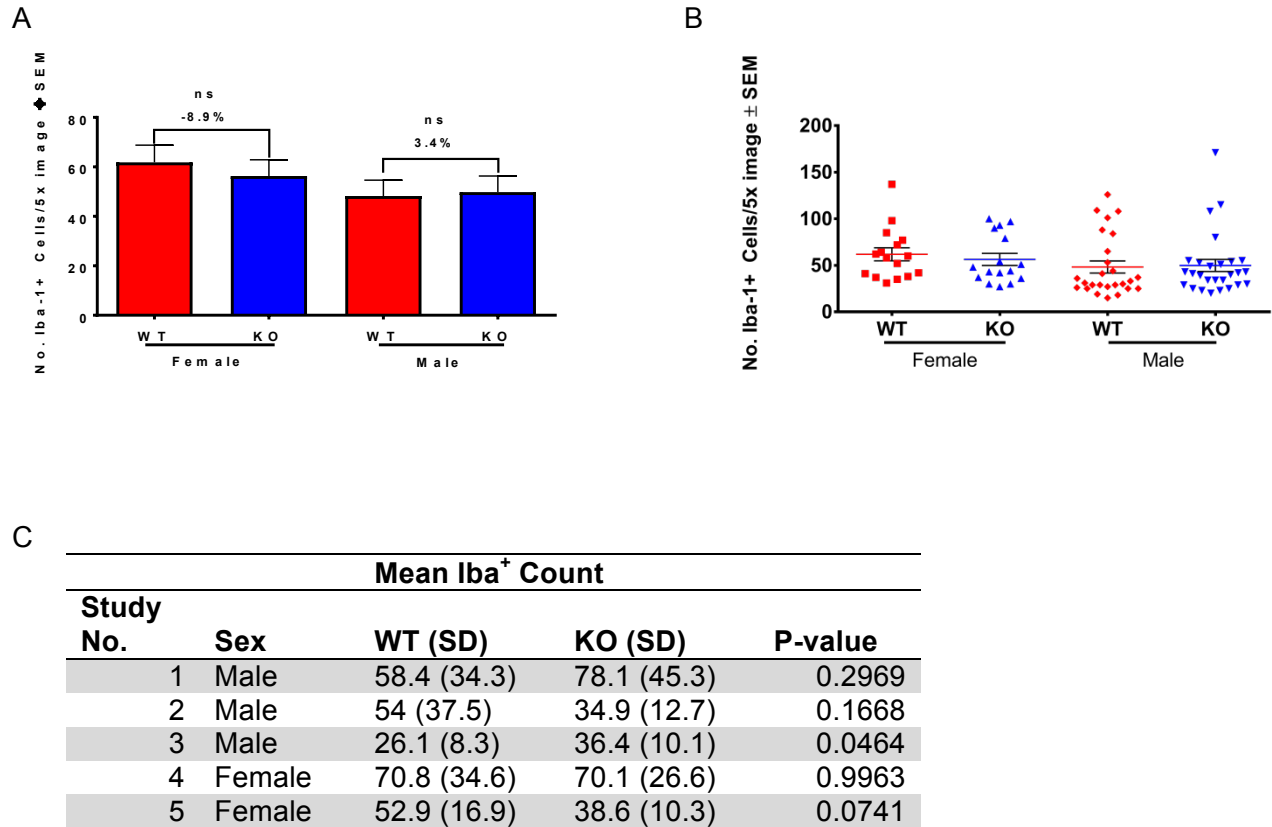

Supplemental Figure 2: Ccl2 KO mice exhibit larger CNV area but similar Iba1<sup>+</sup> cellular infiltration compared to wildtype littermate controls. (A) bar graph, and (B) dot plot of pooled data from experiments summarized in table C (n = 2 studies in females, n = 3 studies in males, n = 10 eyes/group/condition). Statistics were assessed with an unpaired t-test.
