# Supplementary material for: Amount of Mononuclear Phagocyte Infiltrate Does Not Predict Area of Experimental Choroidal Neovascularization (CNV)
Source: PubMed Central journal article supplement — J Ocul Pharmacol Ther. 2018 Sep 1;34(7):489–99. doi: 10.1089/jop.2017.0131 (PMC6152860; doi:10.1089/jop.2017.0131), 2018-09-01
Supplement: Supp_Fig3.pdf [file Supp_Fig3.pdf]

### Supplemental Figure 3

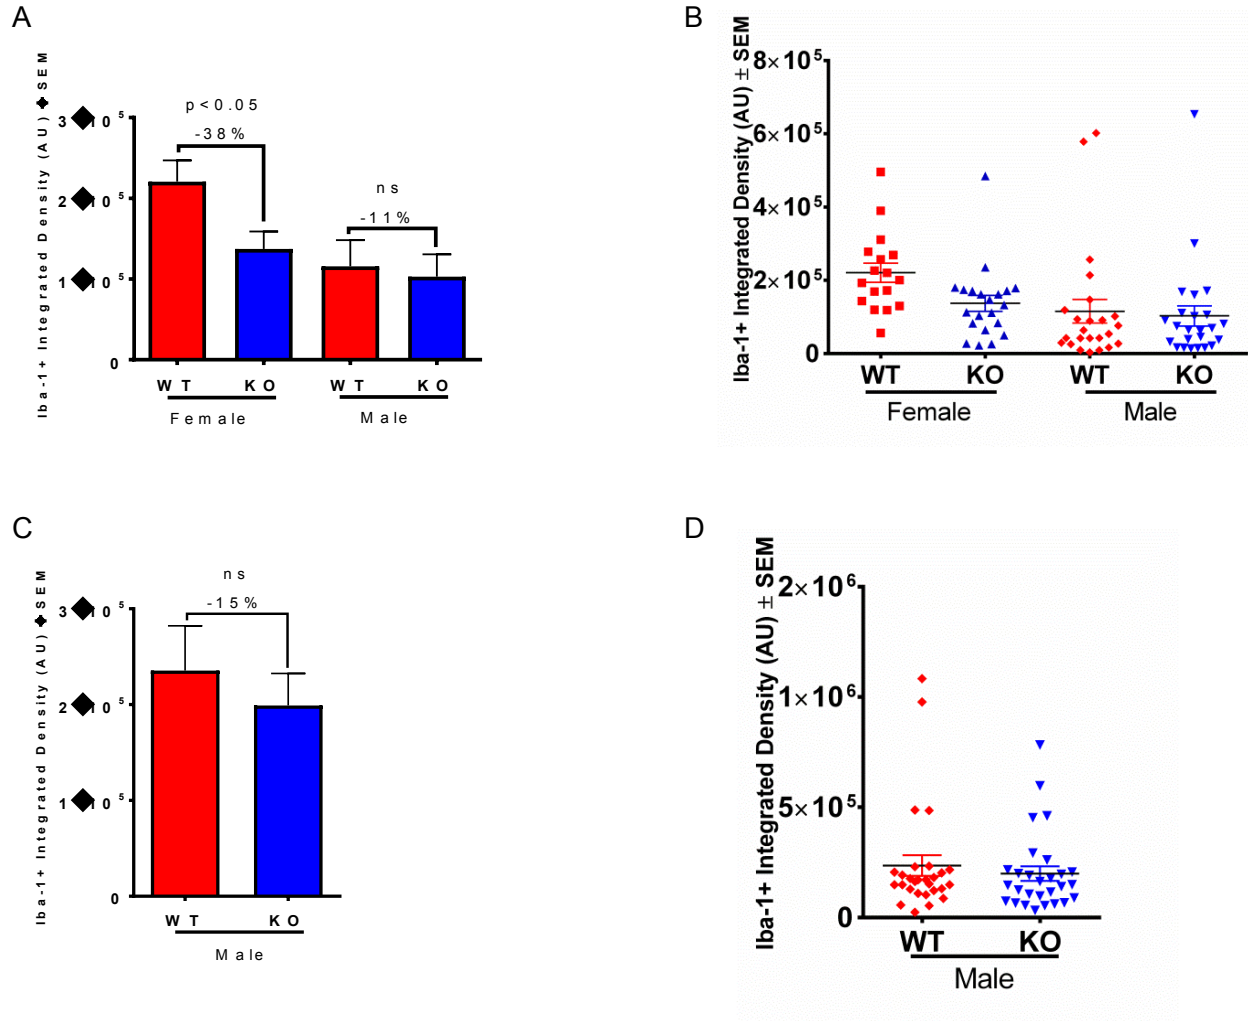

Supplemental Figure 3: Iba1<sup>+</sup> cell integrated density is reduced in females and similar in male Ccl2 KO mice compared to controls. (A & C) bar graph and (B & D) dot plot of intensity of Iba1<sup>+</sup> label in CNV lesions 7 days after laser (n = 1 study in females, n = 2 studies in males, n = 17 – 24 data points per group). Statistical analysis performed by an unpaired t-test. AU = arbitrary units, ns = non-significant, p > 0.05
